# Supplementary material
Source: publisher figshare collection journal article supplement (https://acs.figshare.com/ndownloader/files/7413415)
Supplement: Supplementary file 1 [file 7413415]

## Supporting Information

Phase behaviour at different temperatures of an aqueous two-phase ionic liquid containing ([BPy] NO<sub>3</sub> + Ammonium sulfate and sodium sulfate + water)

Yuliang Li<sup>\*a, b</sup>, Rong Huang<sup>a</sup>, Qi Zhu<sup>a</sup>, Yonghong Yu<sup>a</sup>, Jing Hu<sup>c</sup>

<sup>a</sup> School of Environmental Science and Engineering, Chang'an University, Xi'an, 710064, China

<sup>b</sup> Key laboratory of Subsurface Hydrology and Ecological Effects in Arid Region, Ministry of Education, 710064, Xi'an, China

<sup>c</sup> State Key Laboratory of Loess and Quaternary Geology, Institute of Earth Environment, Chinese Academy of Sciences, Xi'an 710075, China

The corresponding author's email: [yulianglee@hotmail.com](mailto:yulianglee@hotmail.com)

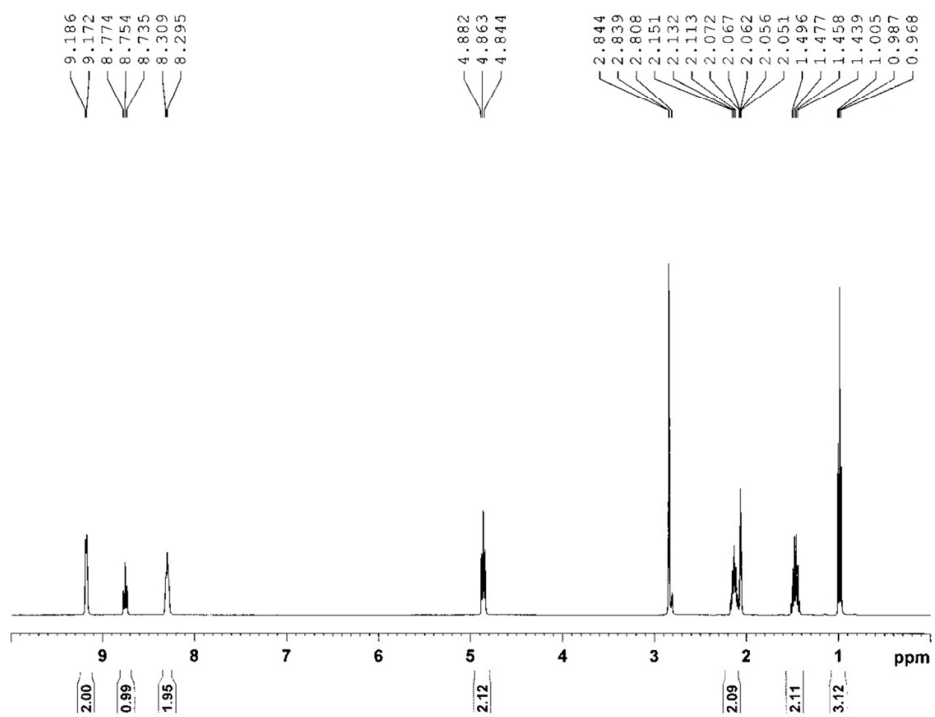

**Figure S1.** the NMR of ionic liquid [BPy] $\text{NO}_3$  (Deuterated acetone)
